# Supplementary material for: A Preliminary Study for Identifying Genes Associated with Pellicle Development in Xinjiang Walnut (Juglans regia L.)
Source: MDPI journal article supplement (doi:10.3390/horticulturae8090784), 2022-08-29
Supplement: s1 [file s1]

## Supplemental figure

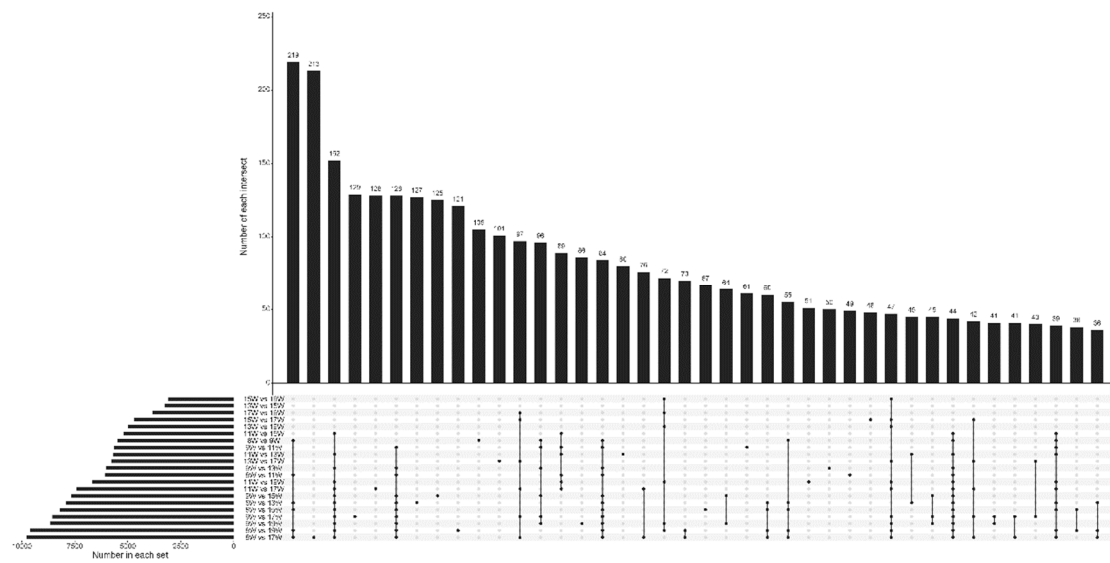

**Figure S1. The upset diagram of several DEGs in a different group.**

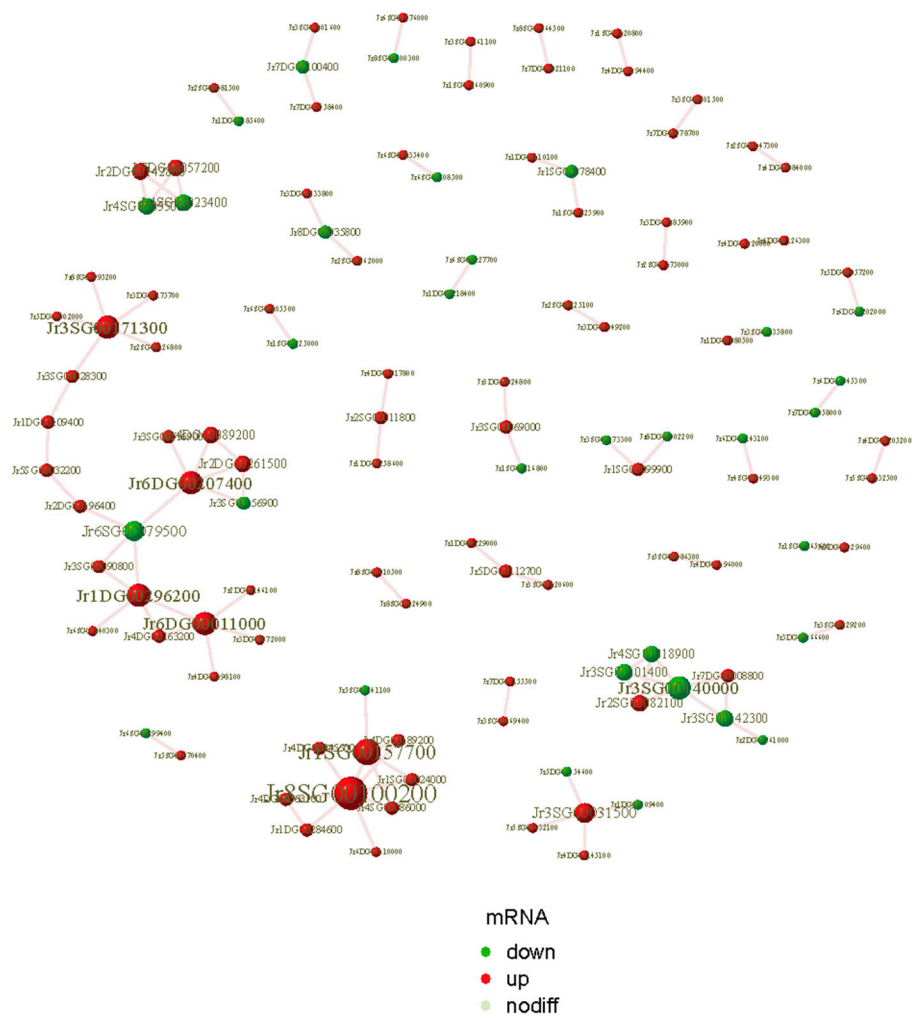

**Figure S2. Network of key DEGs between 11- and 15-week samples.**



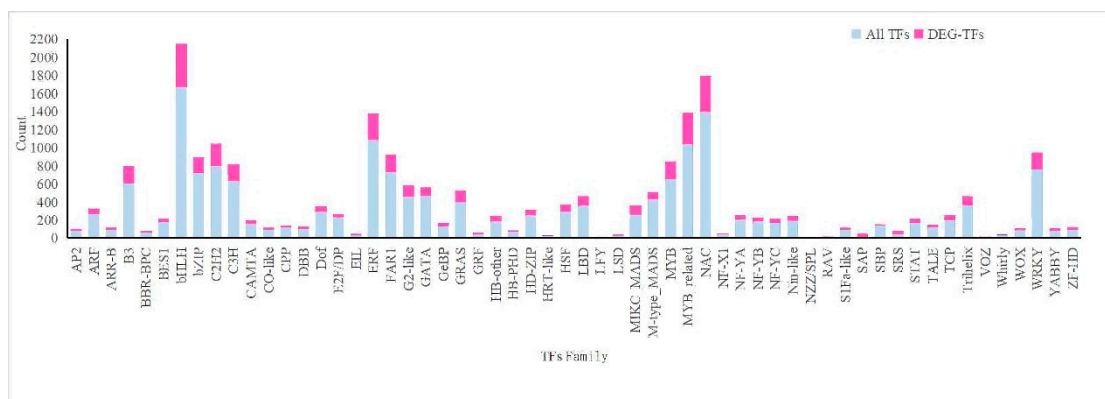

**Figure S4. The differential expressed transcription factor.**

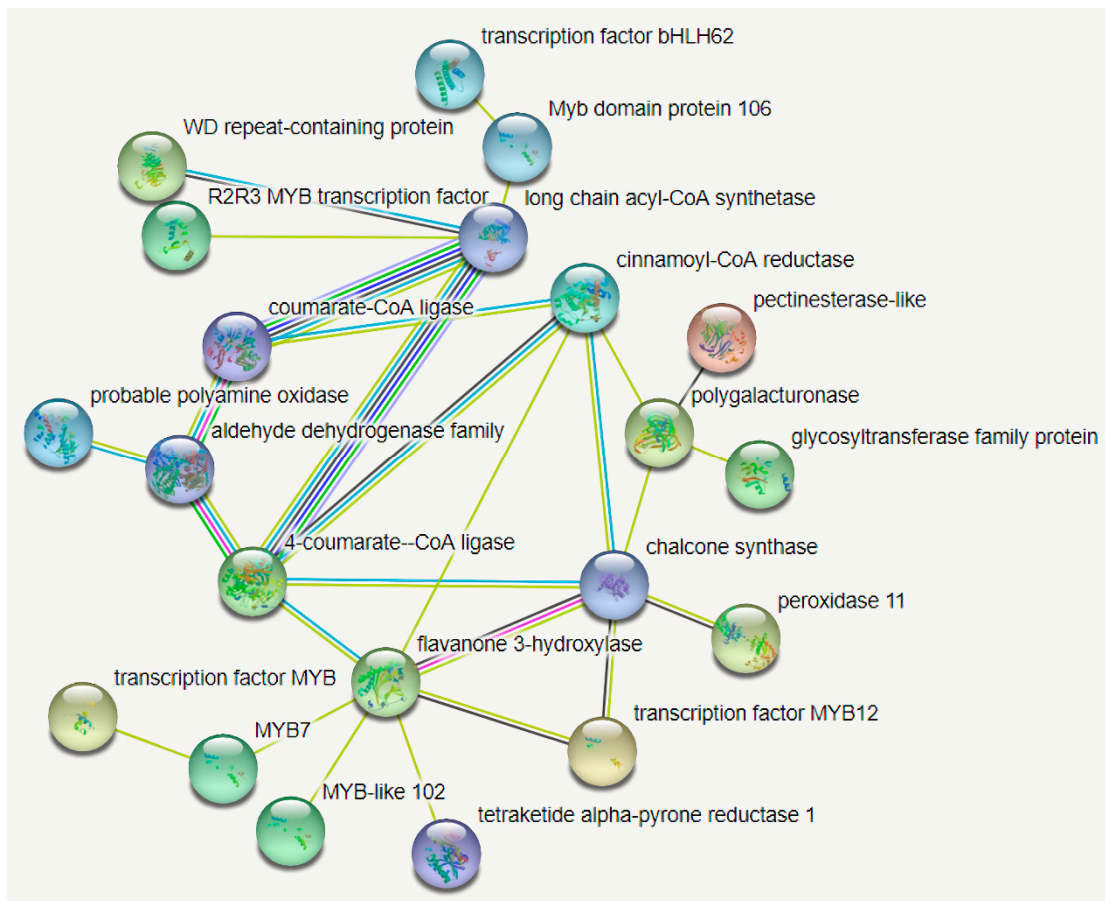

**Figure S5. The protein-protein interaction network of a differentially expressed transcription factor.** The colored nodes represent query proteins. Known interactions: from curated databases; experimentally determined; predicted interactions: gene neighborhood; gene fusions; gene co-occurrence;
